# Supplementary material for: TRIM32 promotes proliferation and confers chemoresistance to breast cancer cells through activation of the NF-κB pathway
Source: PubMed Central journal article supplement — J Cancer. 2018 Apr 5;9(8):1349–56. doi: 10.7150/jca.22390 (PMC5929078; doi:10.7150/jca.22390), 2018-04-05
Supplement: jcav09p1349s1.pdf [file jcav09p1349s1.pdf]

**Supplementary Figure 1. Effects of siRNA2 on T47D cells.**

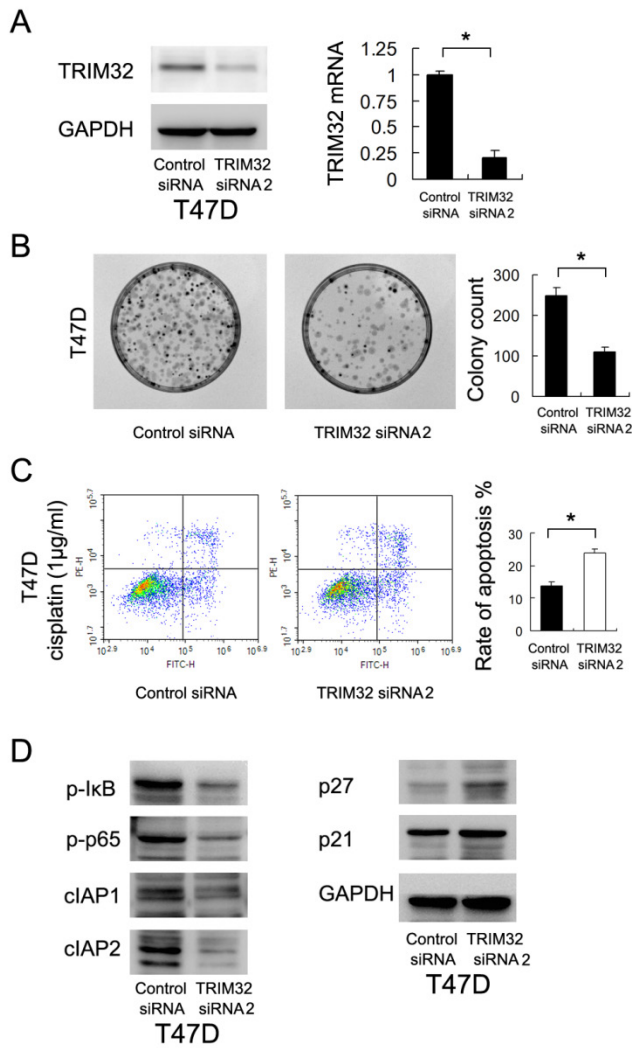

A. Western blot and PCR analysis demonstrating that TRIM32 siRNAs markedly decreases its mRNA and protein levels in T47D cells. B. TRIM32 siRNA2 downregulated colony number in T47D cells. C. Annexin V/PI staining shows that TRIM32 siRNA2 upregulates apoptosis in T47D cells treated with 1 µg/ml cisplatin. D. Western blotting demonstrating that protein expression of cIAP1, cIAP2, p-IκB and p-p65 are decreased while p21 and p27 protein are increased in T47D cells after transfection of TRIM32 siRNA2. \* p<0.05.
